# Supplementary material for: XRRA1 Targets ATM/CHK1/2-Mediated DNA Repair in Colorectal Cancer
Source: Hindawi journal article supplement (doi:10.1155/2017/5718968), 2017-01-01

**sFigure 1. Down-regulated expression of XRRA1 in CRC cells can reduce the expression of  $\gamma$ -H2AX after chemotherapeutic agents.**

A. Immunofluorescence staining of  $\gamma$ -H2AX to evaluate the expression of sh-XRRA1 in HT29 and HCT116 cells were treated with capecitabine(CAPE) and carboplatin(CBP) for 24 h

SFigure 1

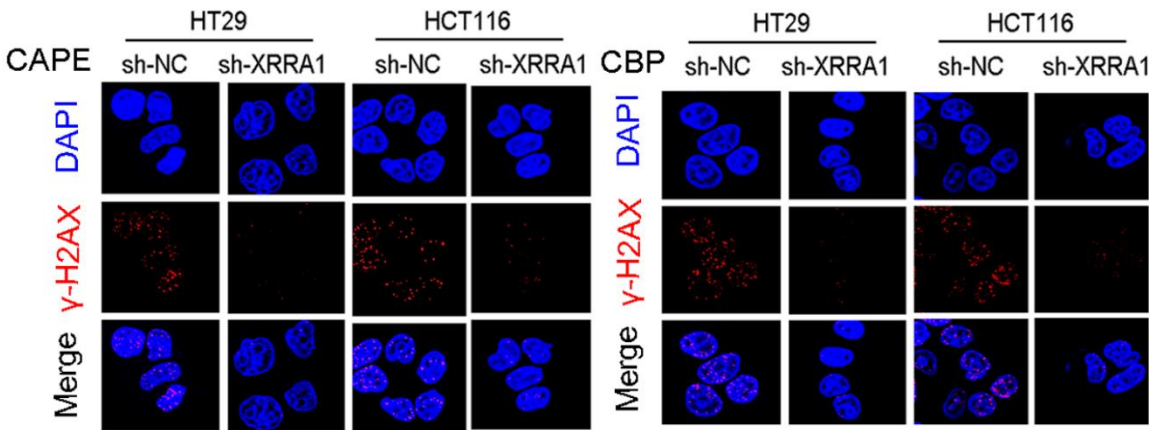

Supplement: f1 [file 5718968.f1.pdf]
